# Supplementary material for: Comprehensive analysis of CTNNB1 in adrenocortical carcinomas: Identification of novel mutations and correlation to survival
Source: PubMed Central journal article supplement (PMC5988720; doi:10.1038/s41598-018-26799-2), 2018-06-05
Supplement: 41598_2018_26799_MOESM1_ESM.pdf [file 41598_2018_26799_MOESM1_ESM.pdf]

## **Supplementary Information**

### **Comprehensive analysis of *CTNNB1* in adrenocortical carcinomas: Identification of novel mutations and correlation to survival.**

Rajani Maharjan\*, Samuel Backman, Tobias Åkerstöm, Per Hellman, Peyman Björklund.

**Affiliations:** Department of Surgical Sciences, Uppsala University, Uppsala, Sweden.

#### **Corresponding Author:**

Rajani Maharjan

Experimental Surgery Group, Department of Surgical Sciences.

Rudbeck Laboratory, R3

75185 Uppsala, Sweden.

Phone: +46184714706

Email: [rajani.maharjan@surgsci.uu.se](mailto:rajani.maharjan@surgsci.uu.se)

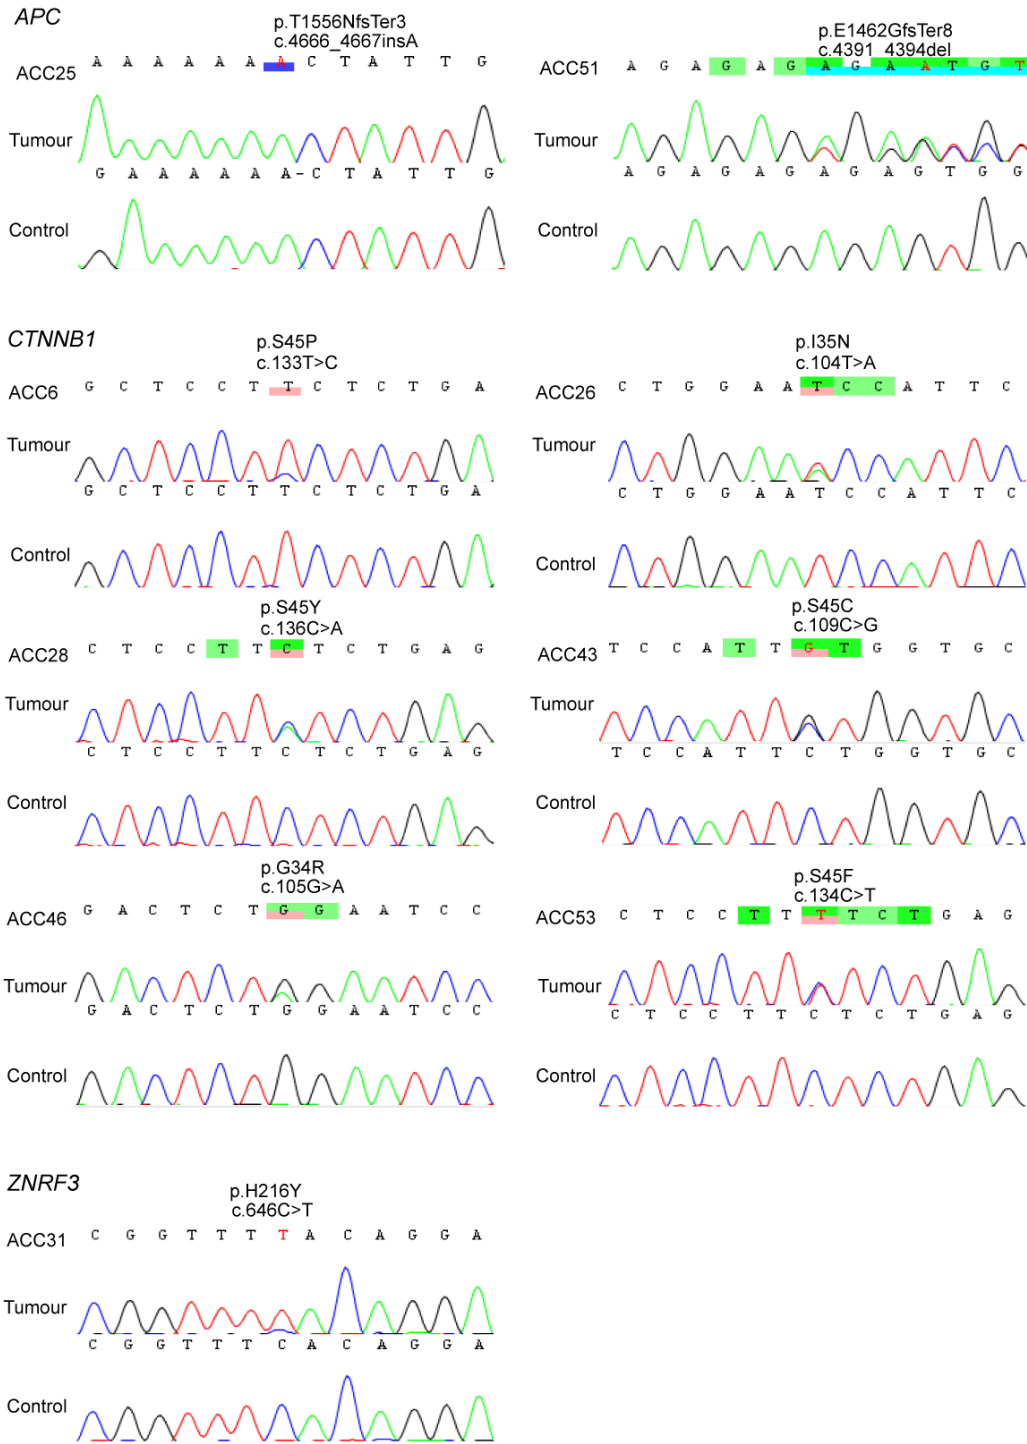

Supplementary Figure S1. Electropherogram showing *CTNNB1*, *ZNRF3* and *APC* mutations.



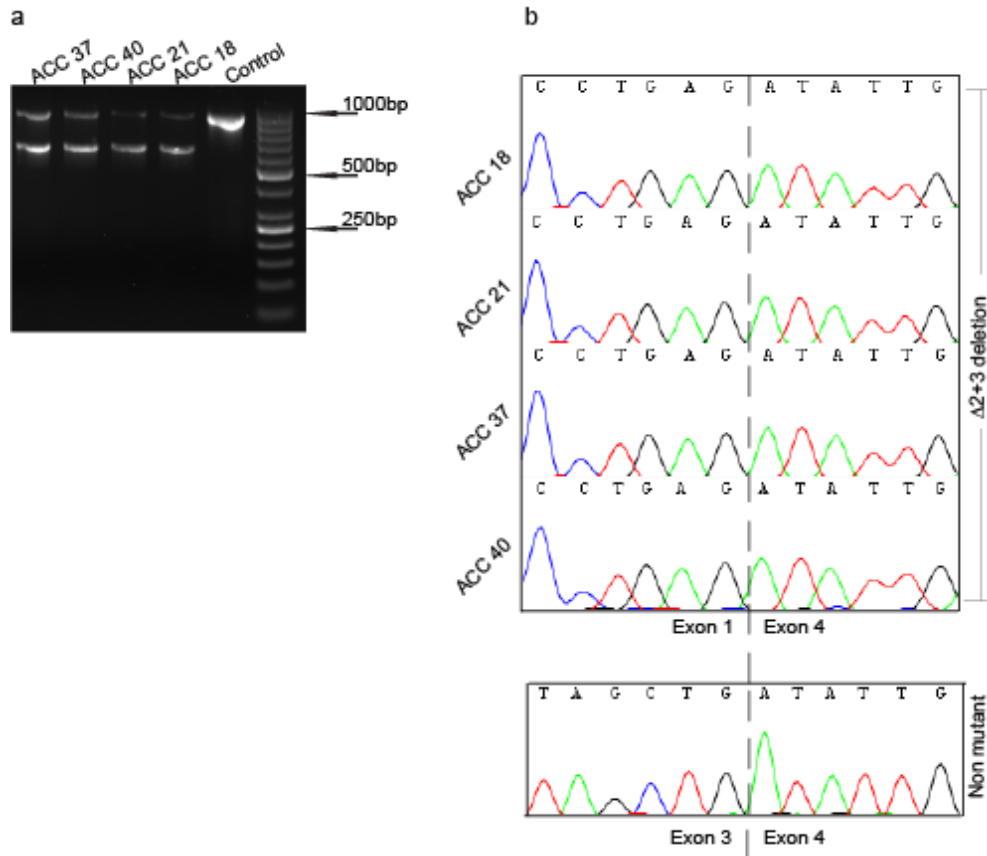

Supplementary Figure S3a) Gel electrophoresis on the cDNA. PCR products showing four ACC tumours with shorter product (630 bases) in addition to the wildtype product (920 bases). b) Electropherogram of ACC 18, ACC 21, ACC 37 and ACC 40 showing deletion of exon 2 and 3 in cDNA unlike non mutant control.

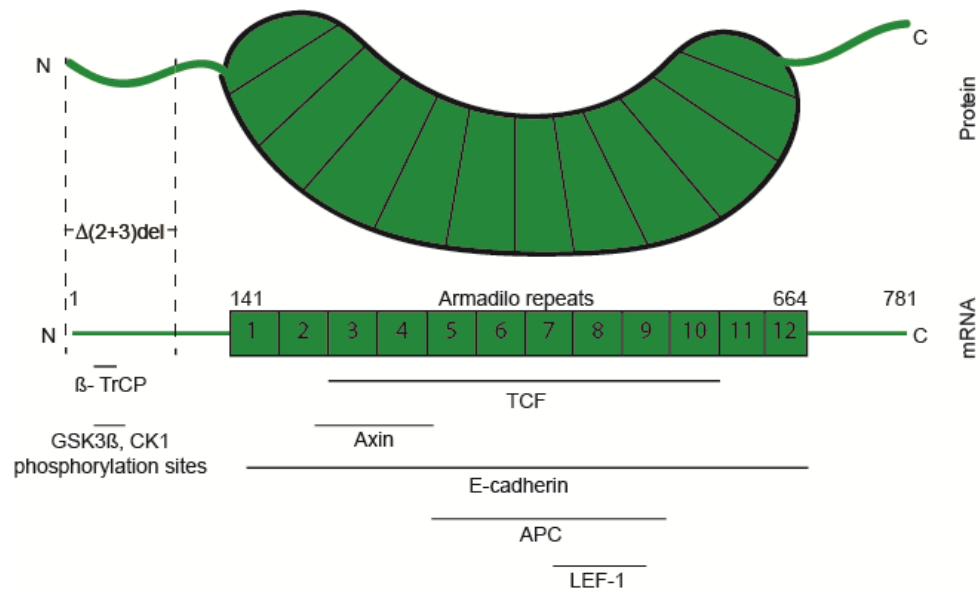

Supplementary Figure S4. Schematic illustration showing simplified  $\beta$ -Catenin mRNA and protein structure (based on crystal structure studies<sup>1,2</sup>) with different binding regions and  $\Delta(2+3)$  deletion site.

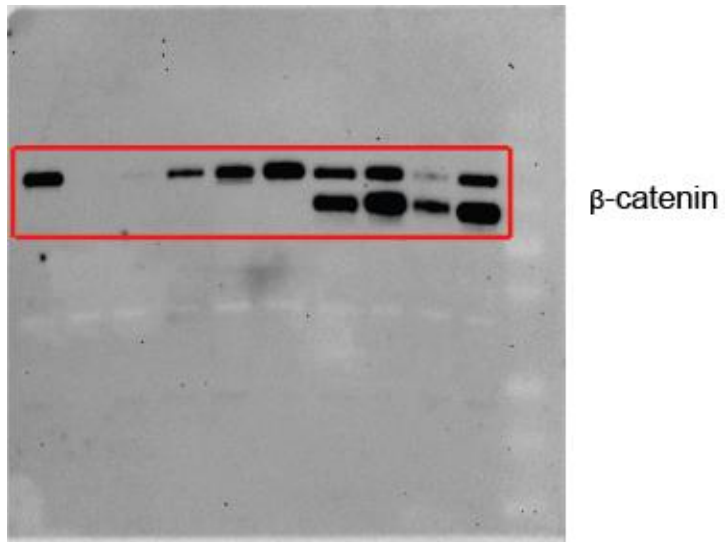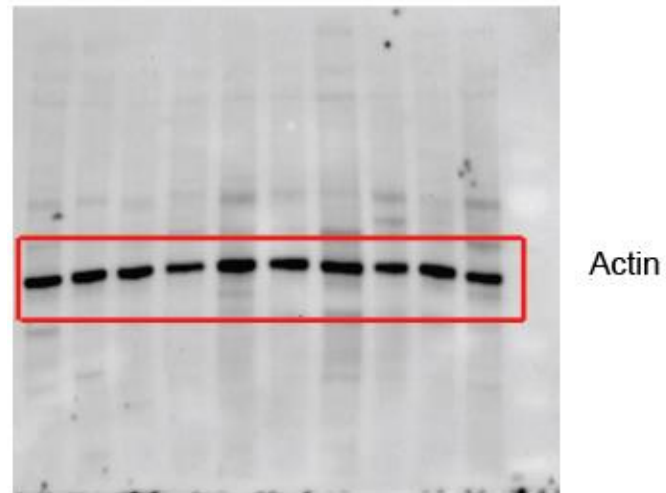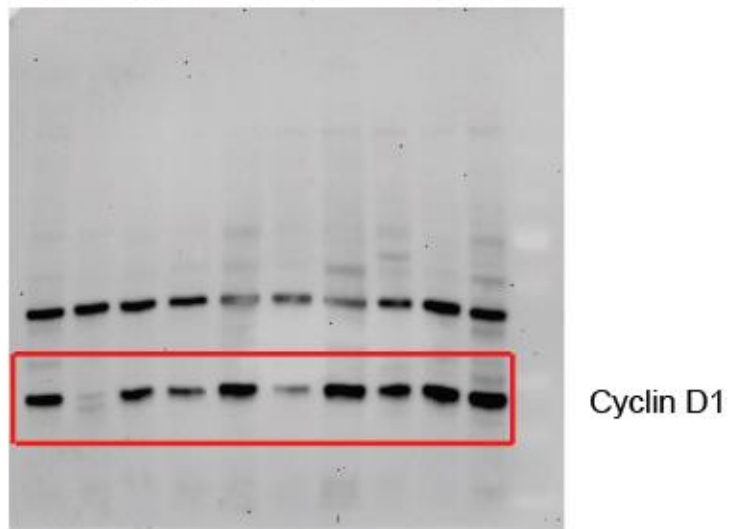

Supplementary Figure S5. Original Western blot for Figure 3a.

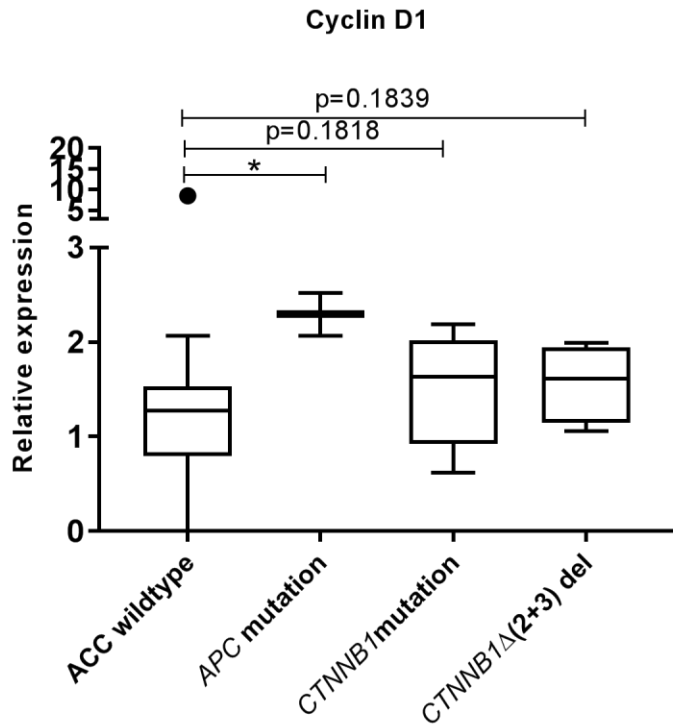

Supplementary Figure S6. mRNA expression of Cyclin D1 in tumour samples harboring *APC* mutation, *CTNNB1* mutation and  $\Delta$ (2+3) deletion in comparison to rest of the cohort devoid of *CTNNB1* mutation or deletion (\*,  $p=0.0144$ ).

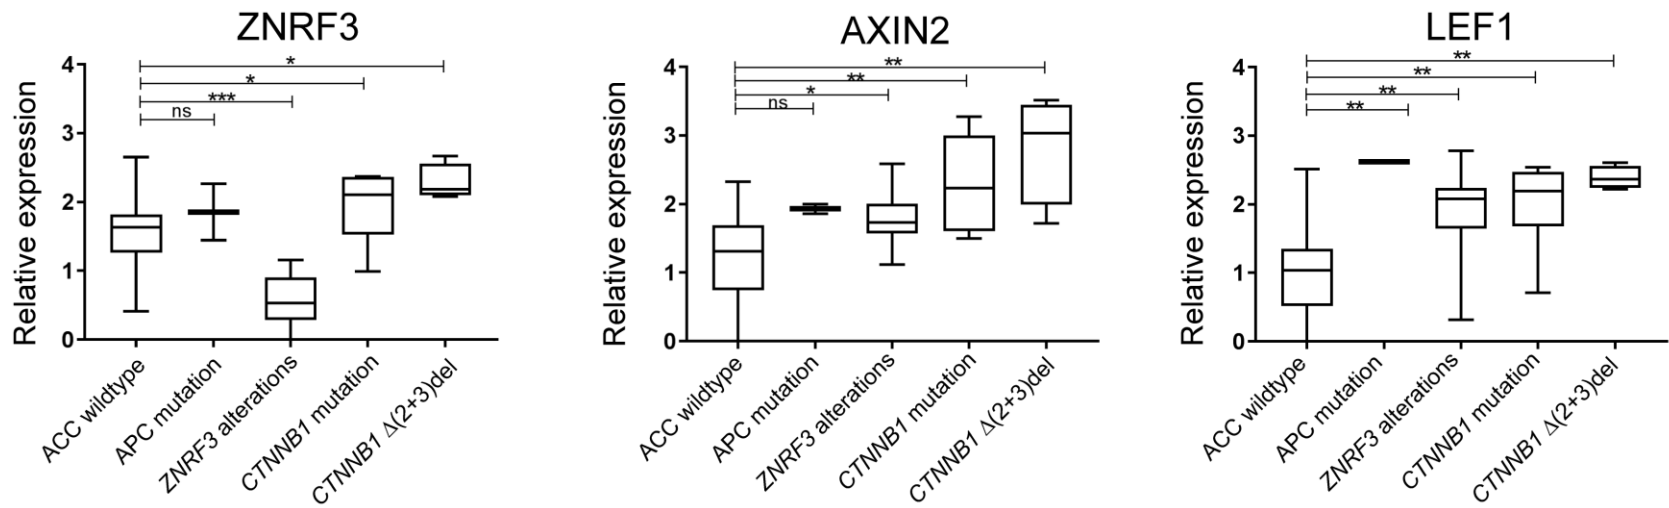

Supplementary Figure S7. mRNA expression of ZNRF3, AXIN2 and LEF1 in tumour samples harboring *APC* mutation, *ZNRF3* alterations, *CTNNB1* missense mutation and  $\Delta(2+3)$  deletion in comparison to rest of the cohort (p values for AXIN2 and ZNRF3 for ACC wildtype vs *APC* mutation are 0.1239 and 0.5813 respectively).



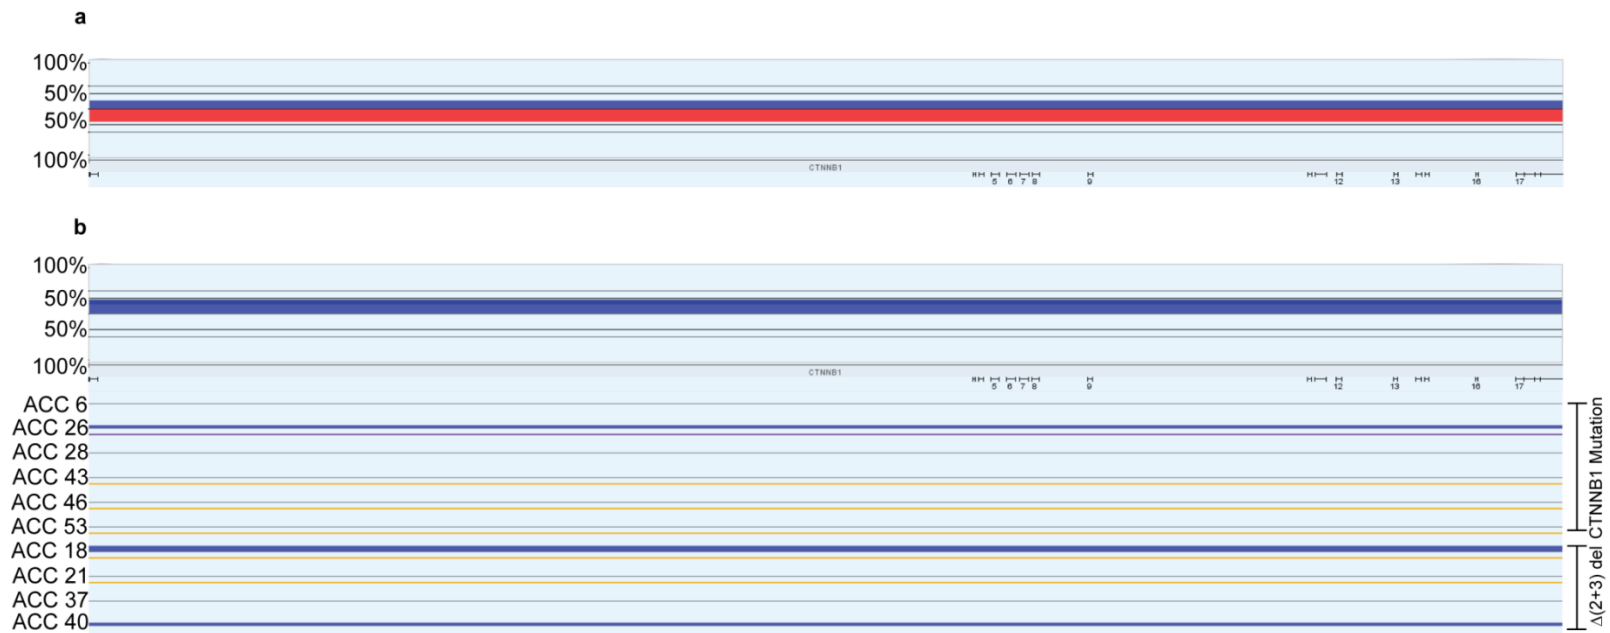

Supplementary Figure S8. SNP array analysis showing a) summary of events at *CTNNB1* locus 3p22.1 in the tumours without *CTNNB1* mutations b) summary of events at *CTNNB1* locus 3p22.1 for tumours with *CTNNB1* missense mutation and  $\Delta(2+3)$  deletion (top panel) followed by details of each mutant sample. In the figure; red represents loss, blue represents gain and tan yellow represents loss of heterozygosity.

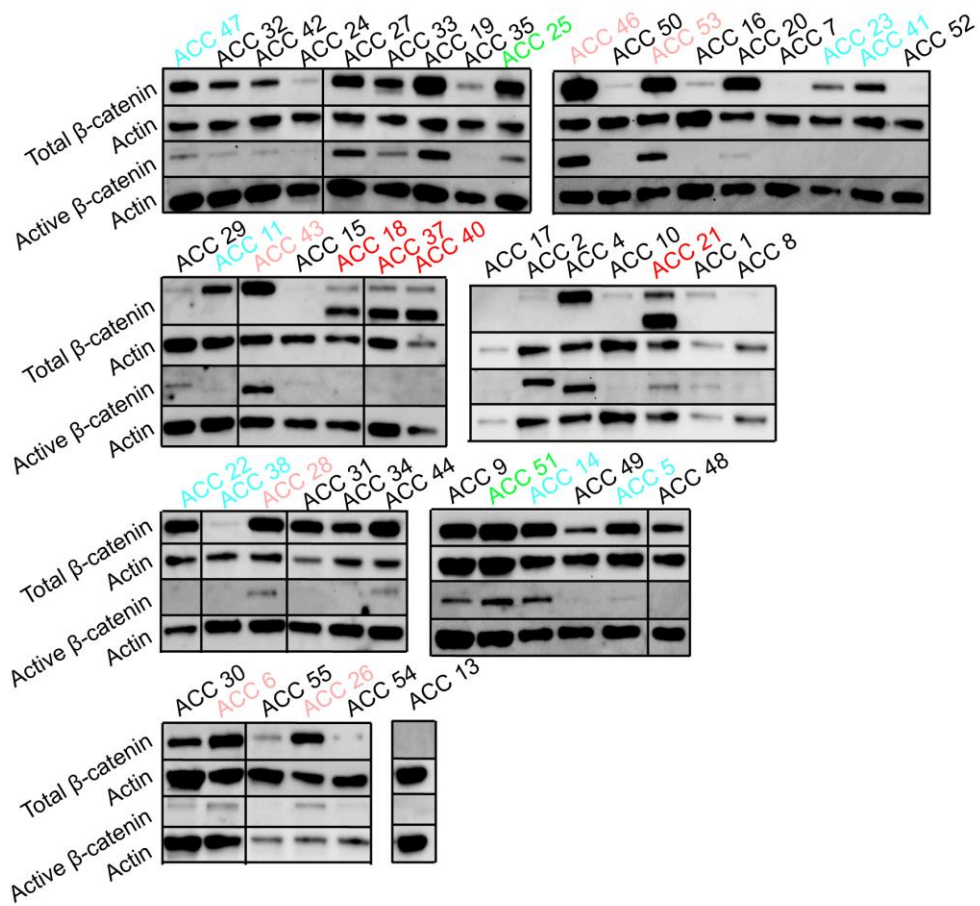

Supplementary Figure S9. Western blot on ACC tumours showing expression levels of total and active  $\beta$ -catenin and actin. The samples with APC mutation, *CTNNB1* missense mutation, *CTNNB1*  $\Delta(2+3)$  deletion and *ZNR3* deletions are highlighted in green, pink, red and blue respectively. Uncropped original blots are shown in Supplementary Fig S16.

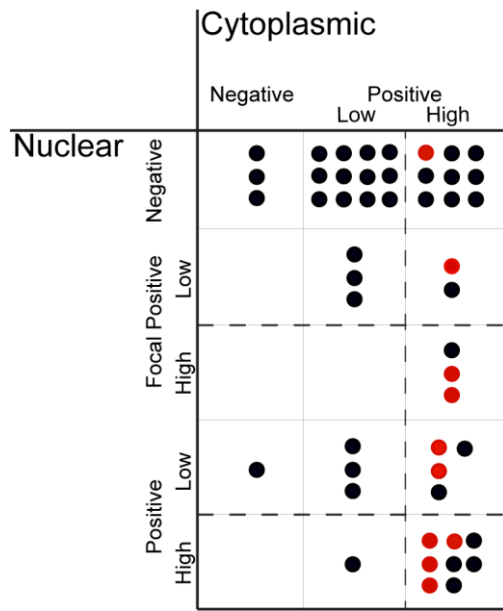

Supplementary Figure S10. Tumours grouped according to the immunohistochemical staining of  $\beta$ -catenin. *CTNNB1* mutants are marked in red and the rest of the samples are marked in black. The samples were scored and categorized as “negative” or “positive” for cytoplasmic staining and as “negative”, “focal positive” (heterogeneous) and “positive” for nuclear staining. For positive cases the nuclear and cytoplasmic staining intensity were scored manually ascending from 1+ to 5+. Samples with 1+ to 2+ scoring were grouped as “low” and those with 3+ to 5+ scoring were grouped as “high”.

a)

ACC 6

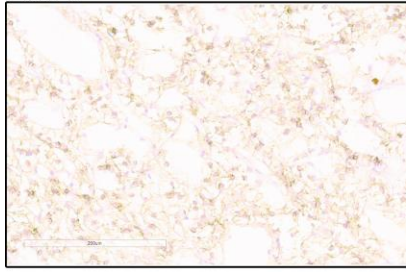

ACC 26

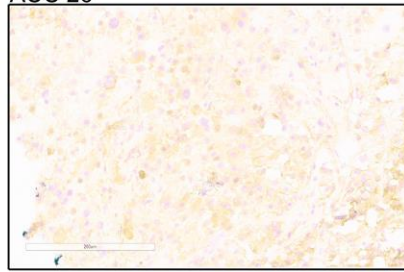

ACC 28

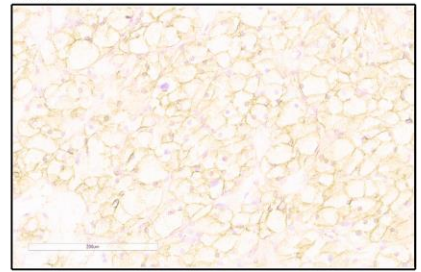

ACC 43

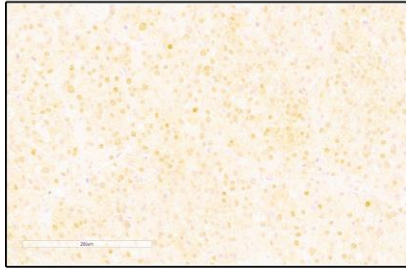

ACC 46

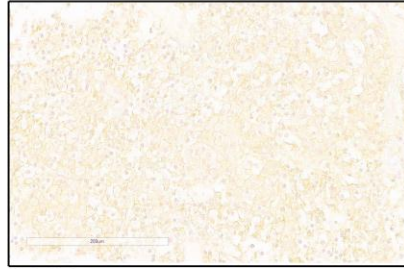

ACC 53

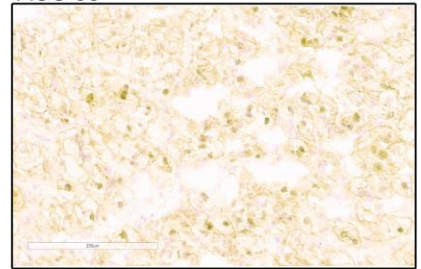

ACC 21

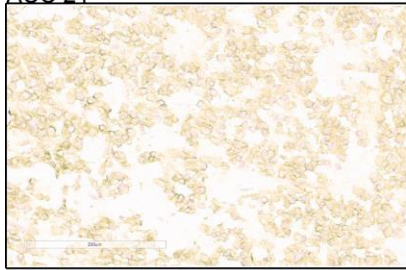

ACC 37

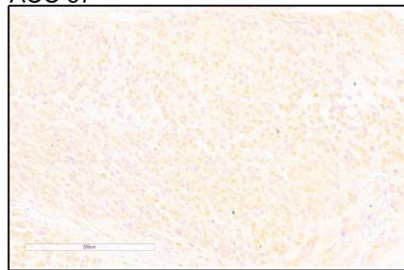

ACC 40

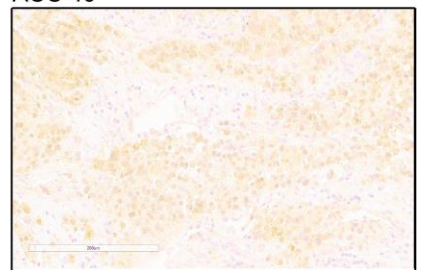

b)

ACC 18

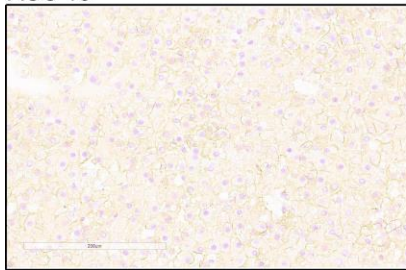



c)

ACC 5

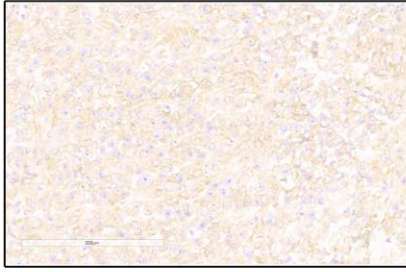

ACC 15

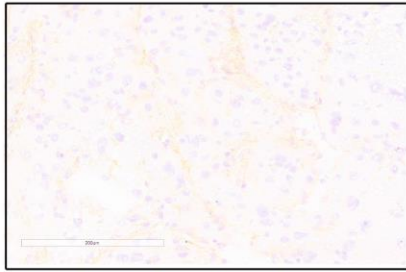

ACC 25

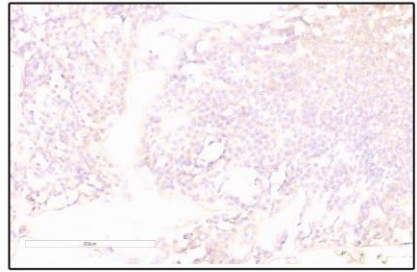

ACC 7

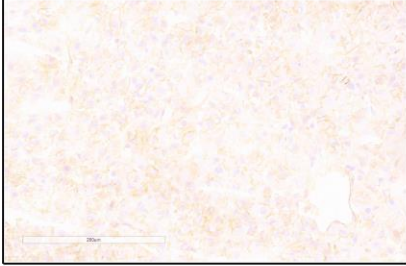

ACC 16

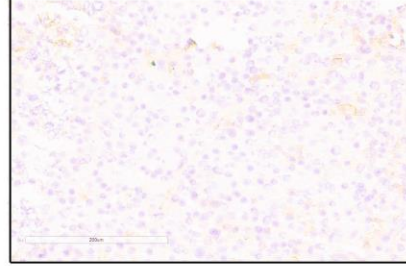

ACC 27

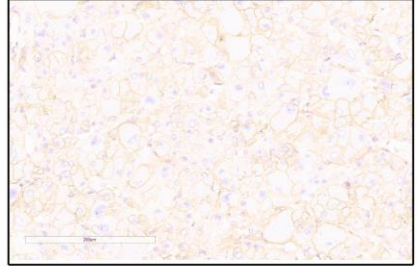

ACC 8

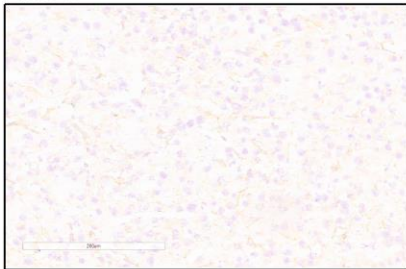

ACC 17

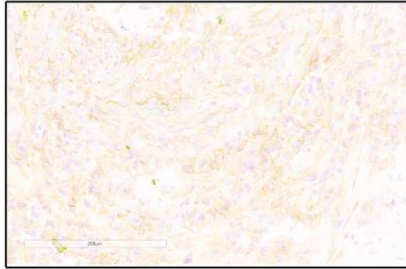

ACC 30

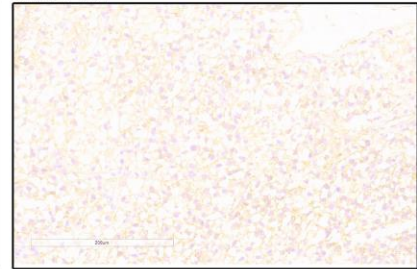

ACC 9

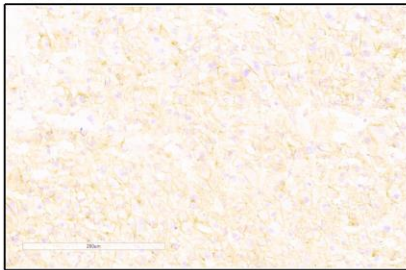

ACC 22

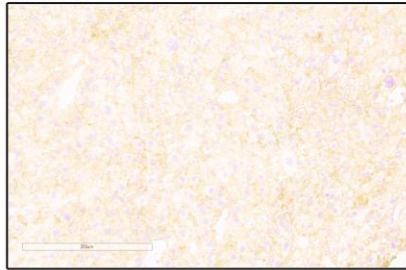

ACC 31

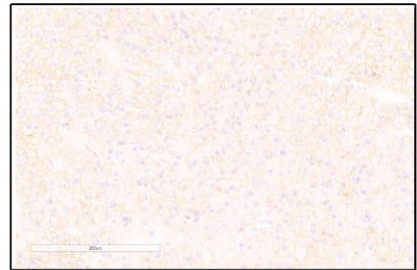

ACC 13

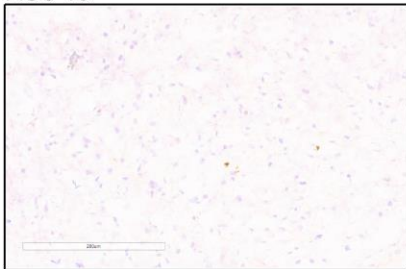

ACC 24

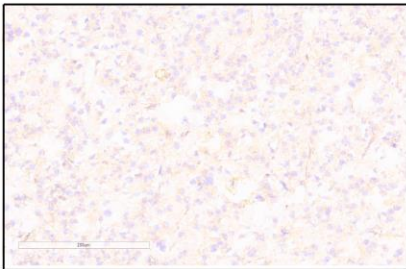

ACC 32

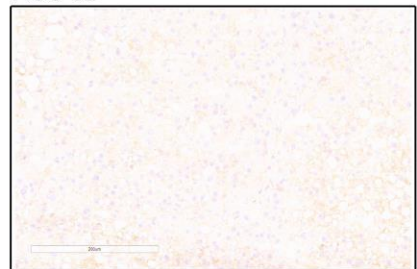

ACC 33

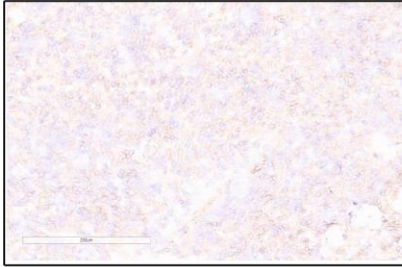

ACC 38

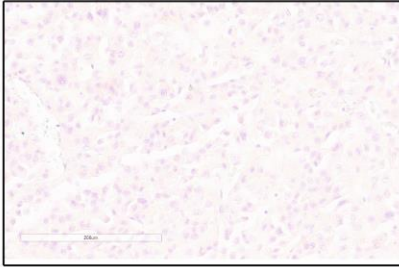

ACC 52

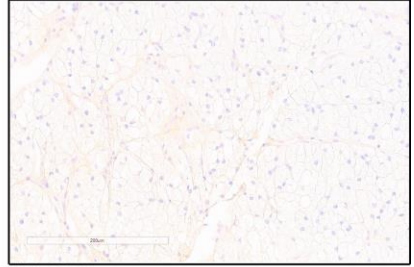

ACC 34

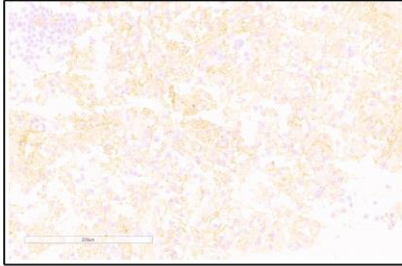

ACC 41

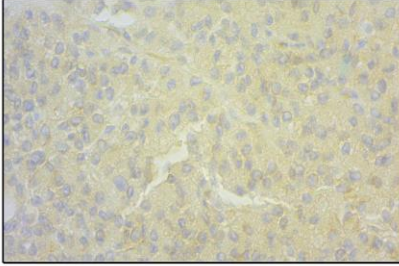

ACC 55

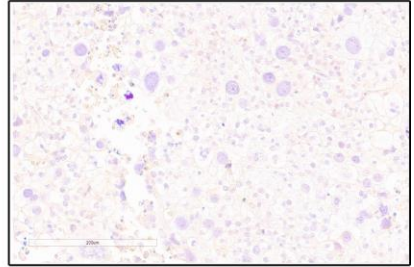

ACC 35

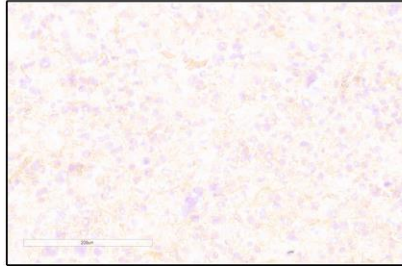

ACC 50

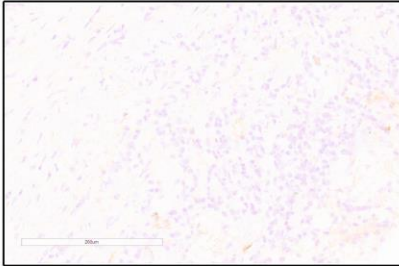



d)

ACC 4

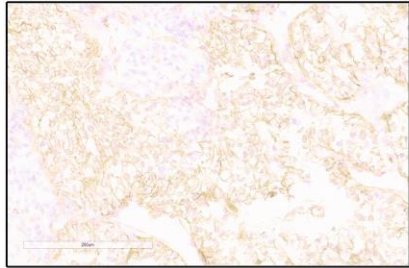

ACC 19

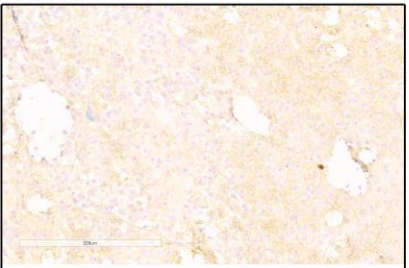

ACC 44

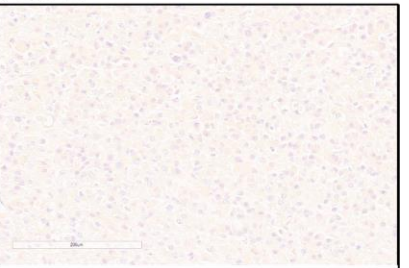

ACC 10

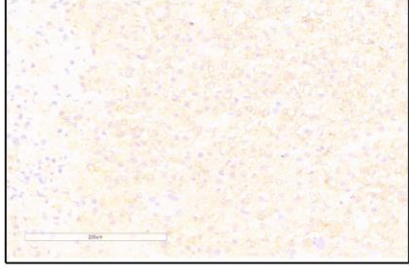

ACC 20

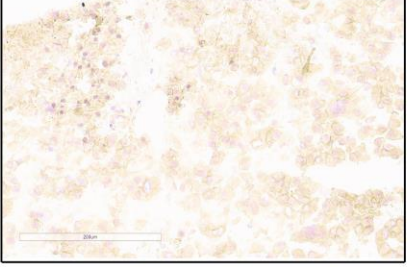

ACC 47

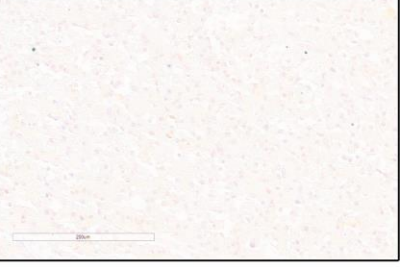

ACC 11

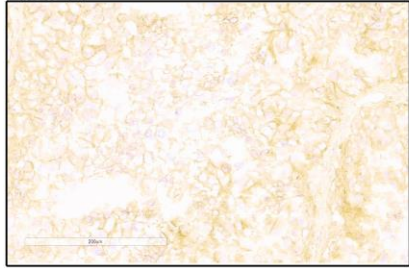

ACC 29

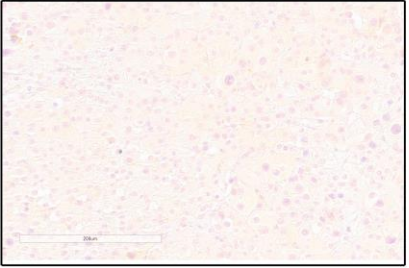

ACC 48

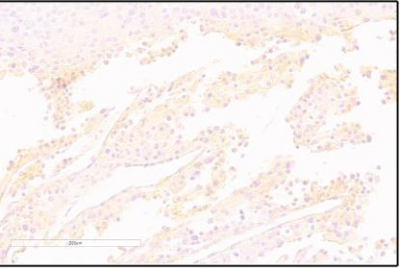

ACC 12

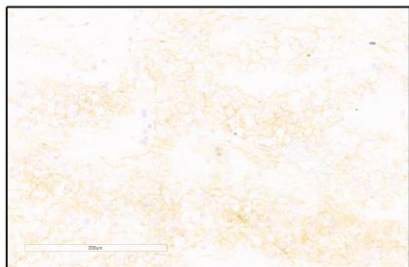

ACC 23

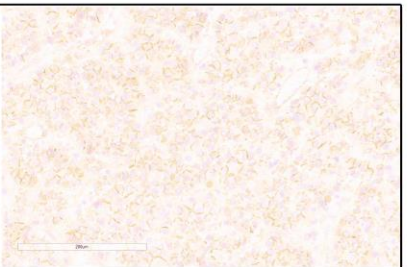

ACC 49

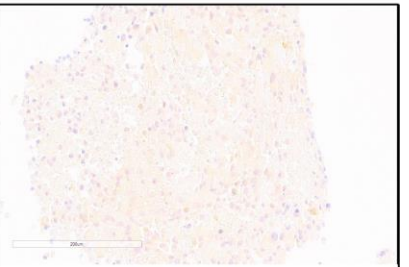

ACC 14

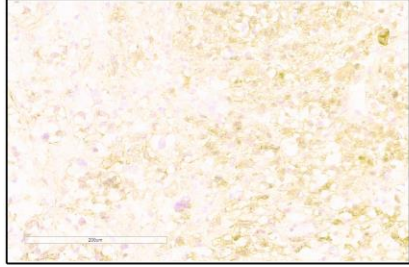

ACC 42

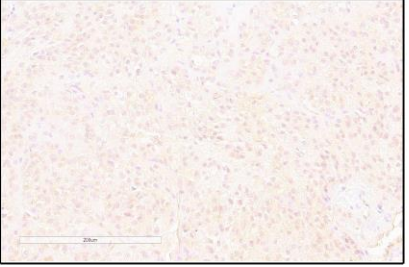

ACC 54

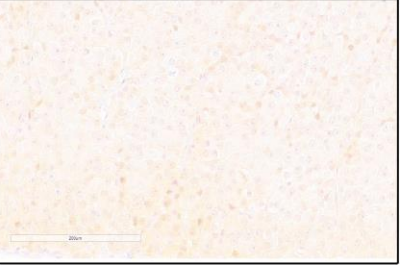





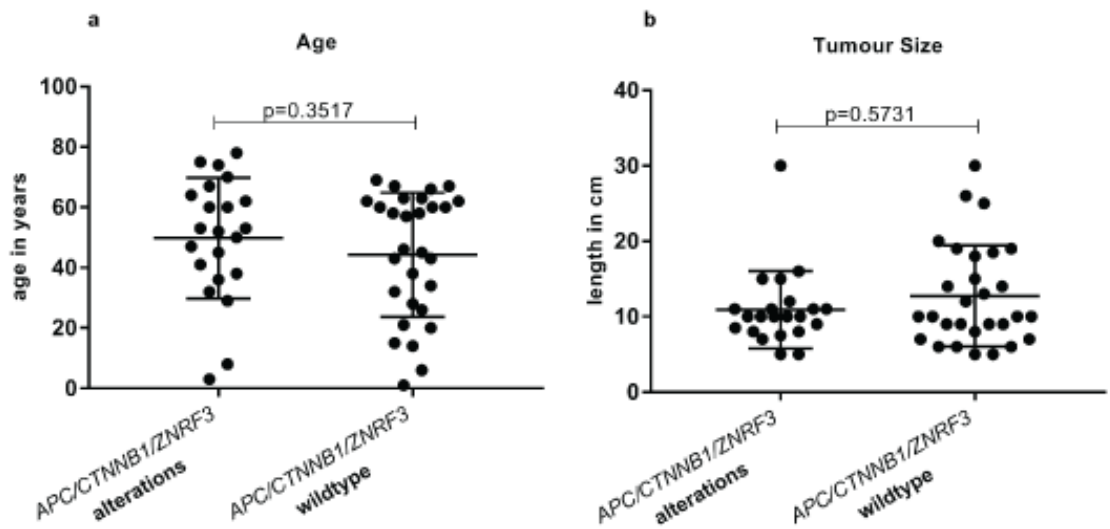

Supplementary Figure S13. a) Age at operation and b) tumour size comparison between group of tumours with *APC/CTNNB1/ZNRF3* alterations versus tumours wildtype for *APC/CTNNB1/ZNRF3*.

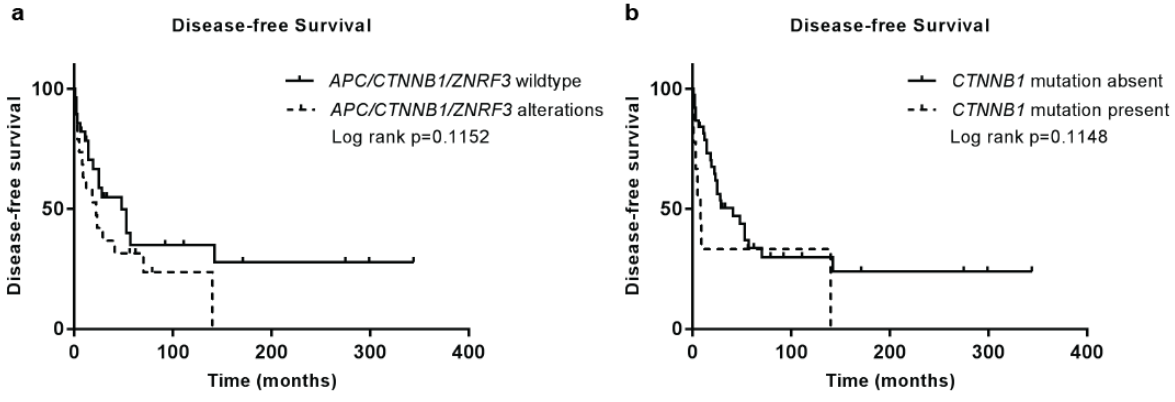

Supplementary Figure S14. Disease-free survival graph for a) patients with tumour harbouring *APC/CTNNB1/ZNRF3* alterations versus the wildtype b) patients with tumour harbouring *CTNNB1* mutations alone versus the wildtype.

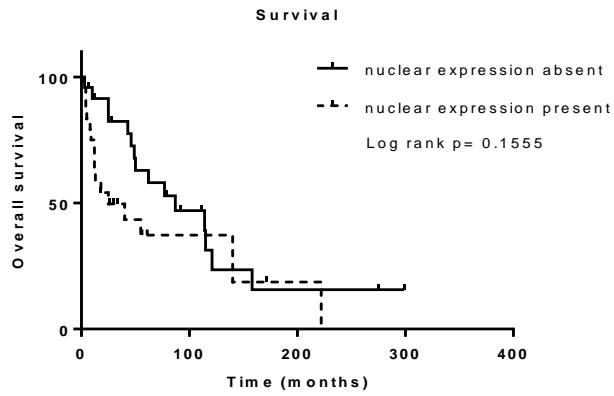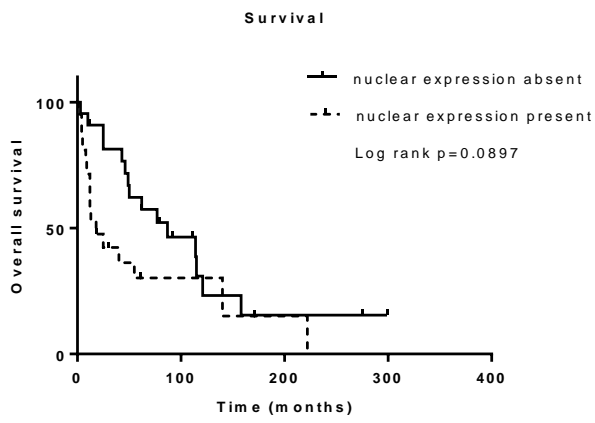

Supplementary Figure S15. Overall survival graph for patients with tumour showing nuclear expression of  $\beta$ -catenin versus those lacking the expression in whole cohort (top) and in adult ACC (bottom).

Pannel 1

Total  $\beta$ -catenin

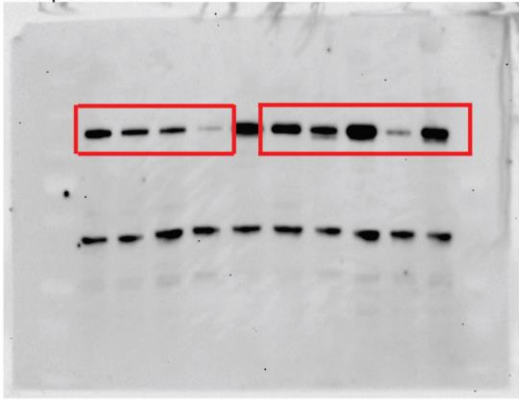

Actin

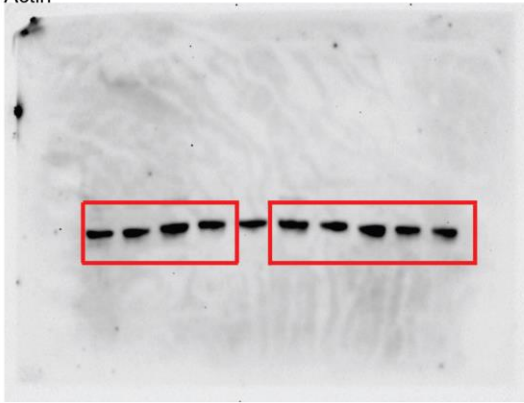

Active  $\beta$ -catenin

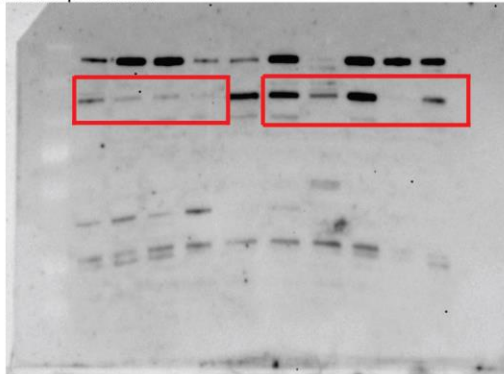

Actin

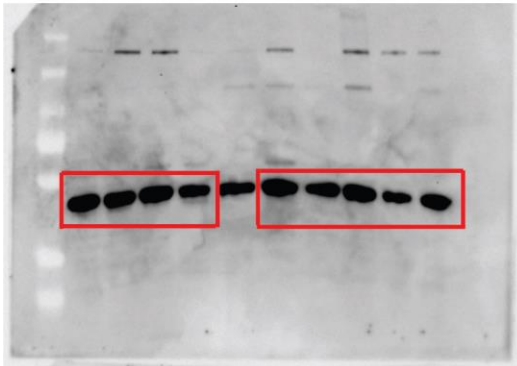

Pannel 2

Total  $\beta$ -catenin

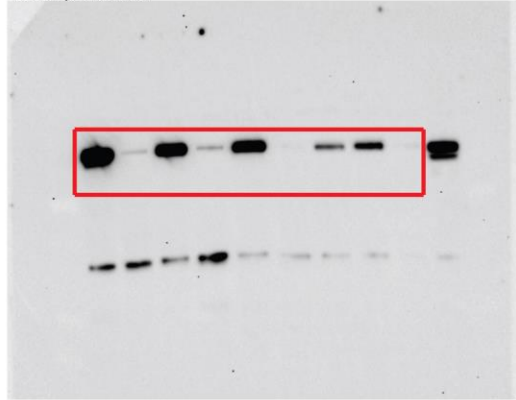

Actin

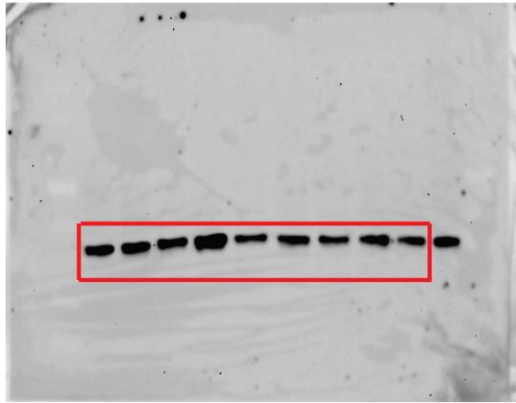

Active  $\beta$ -catenin

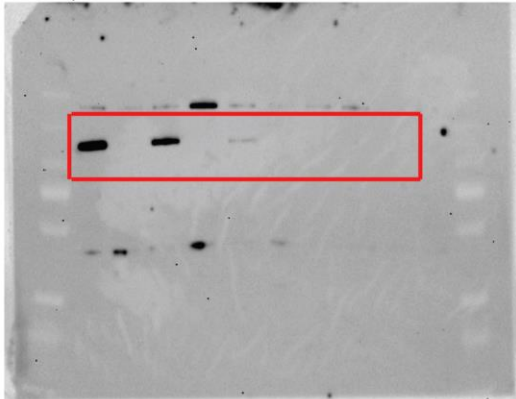

Actin

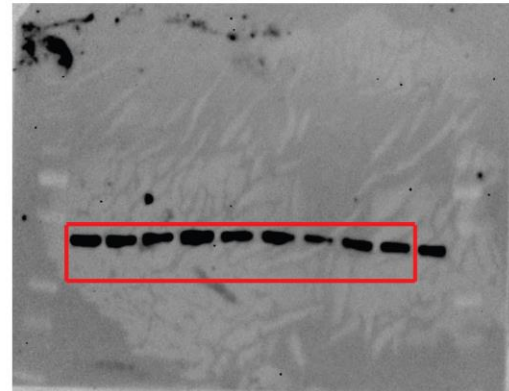

Pannel 3

Total  $\beta$ -catenin

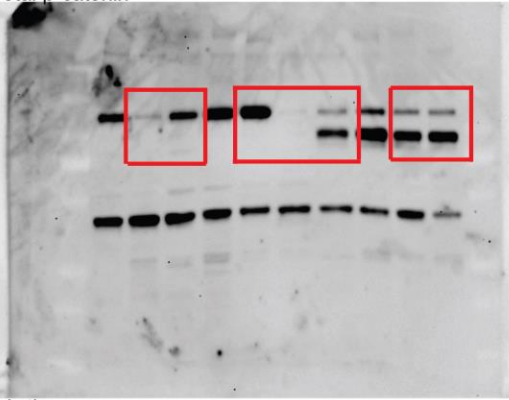

Actin

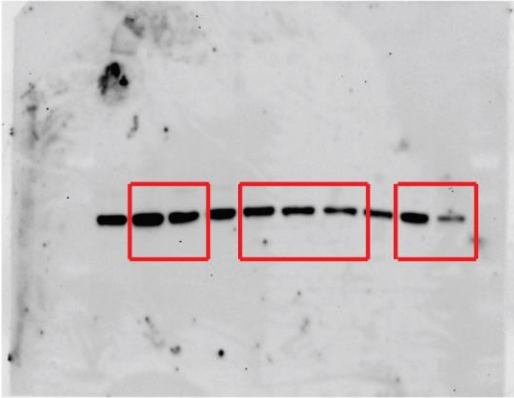

Active  $\beta$ -catenin

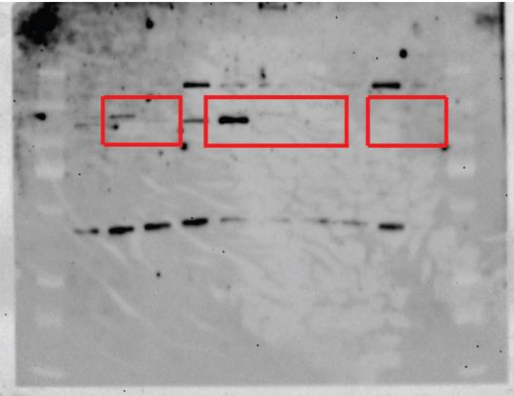

Actin

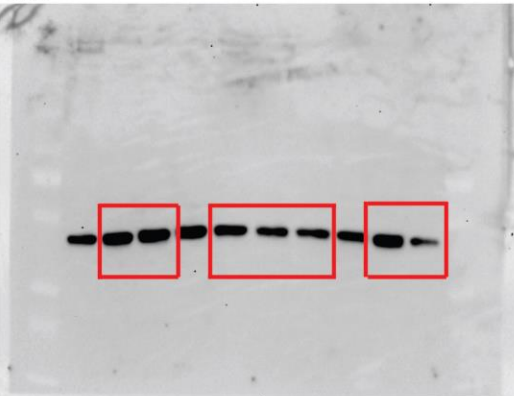

Pannel 4

Total  $\beta$ -catenin

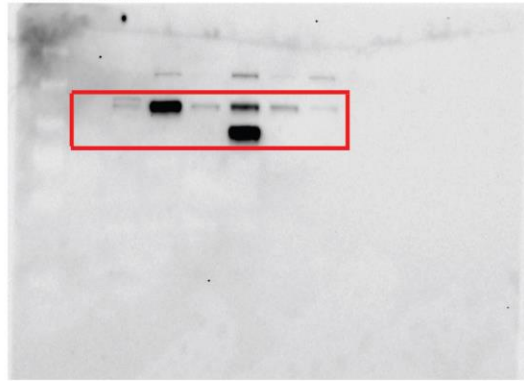

Actin

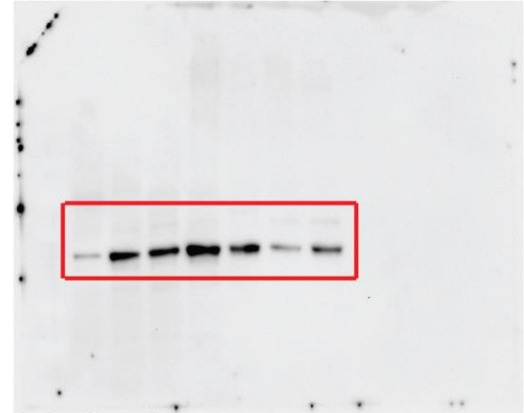

Active  $\beta$ -catenin

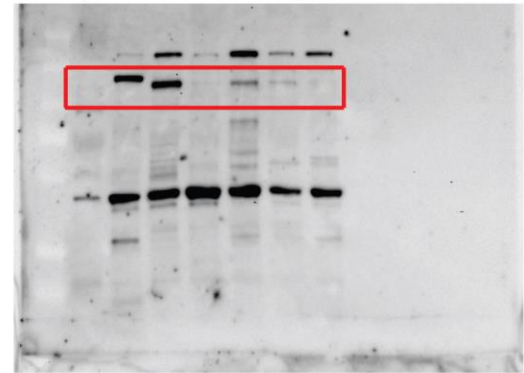

Actin

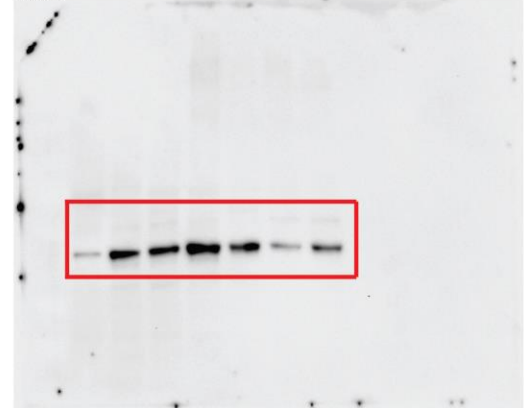

Total  $\beta$ -catenin

Pannel 5

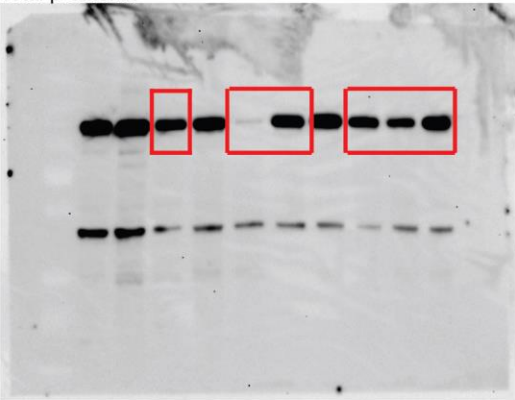

Actin

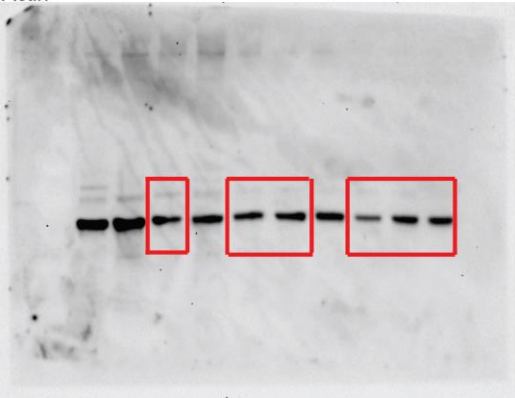

Active  $\beta$ -catenin

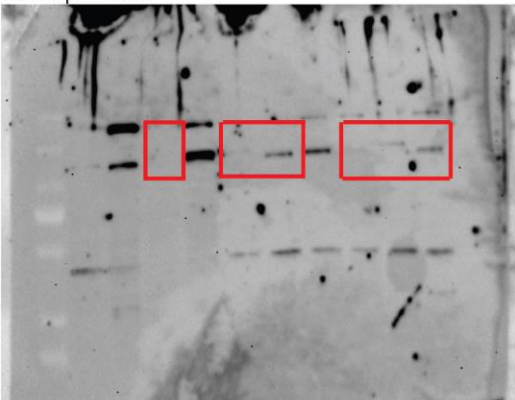

Actin

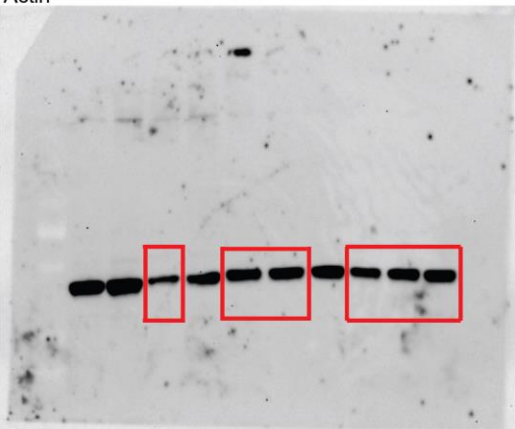

Total  $\beta$ -catenin

Pannel 6

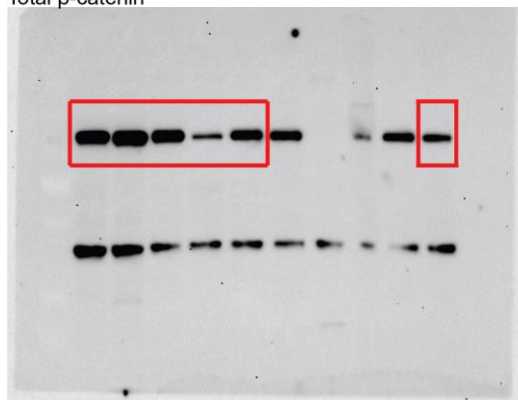

Actin

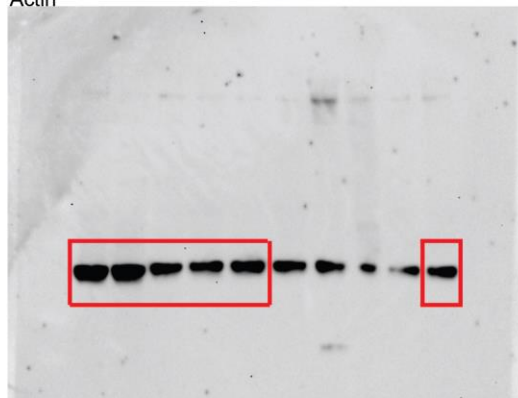

Active  $\beta$ -catenin

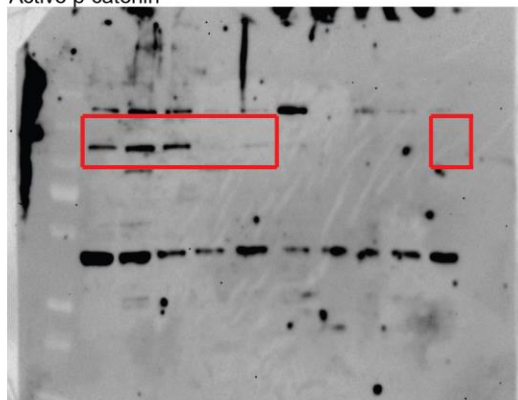

Actin

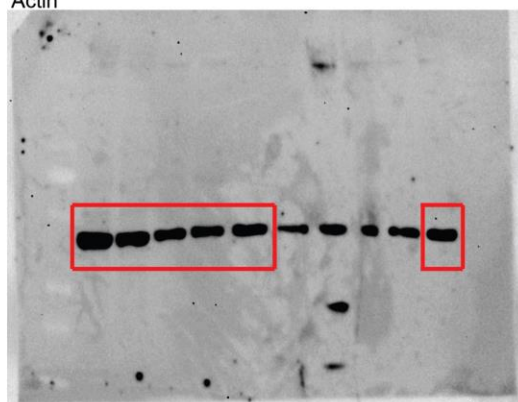



Total  $\beta$ -catenin Pannel 7

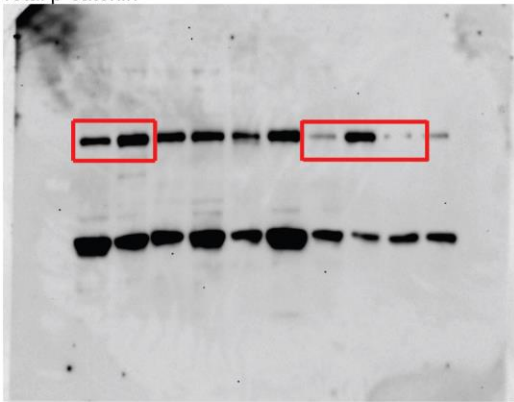

Actin

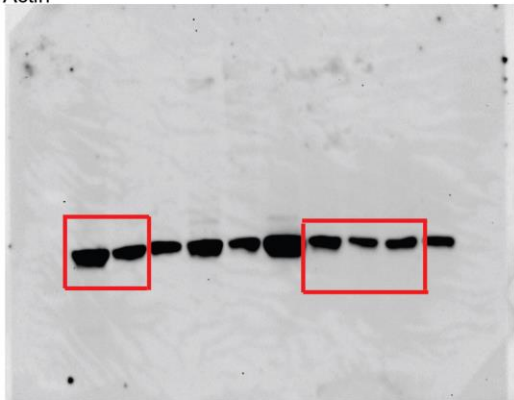

Active  $\beta$ -catenin

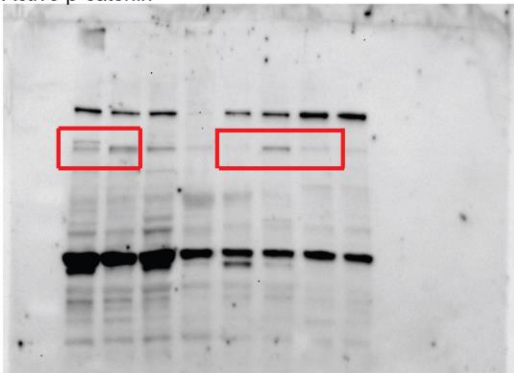

Actin

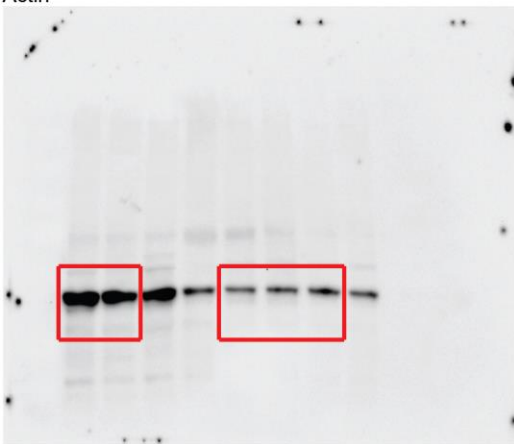

Total  $\beta$ -catenin Pannel 8

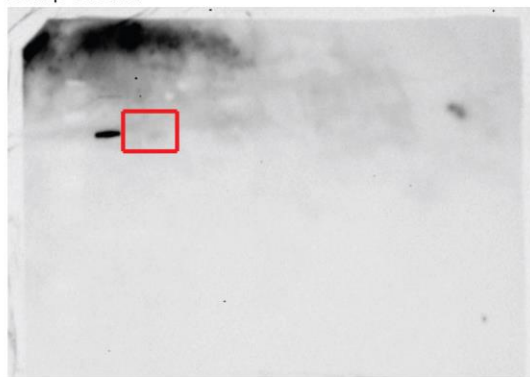

Actin

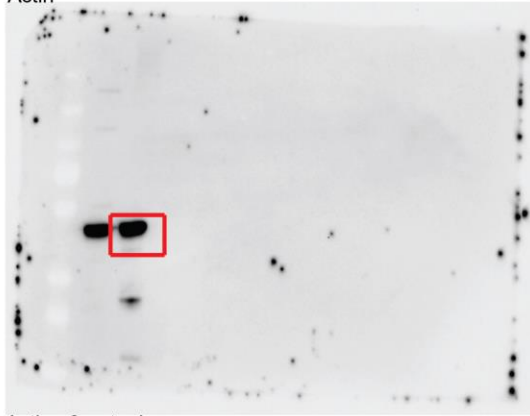

Active  $\beta$ -catenin

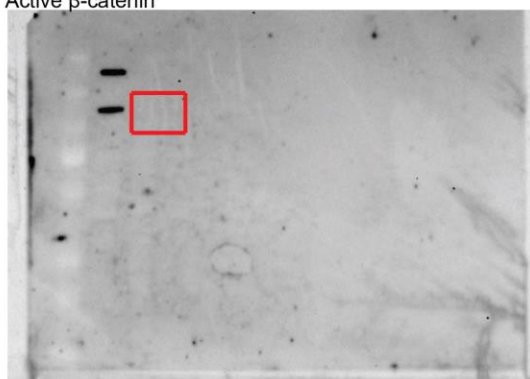

Actin

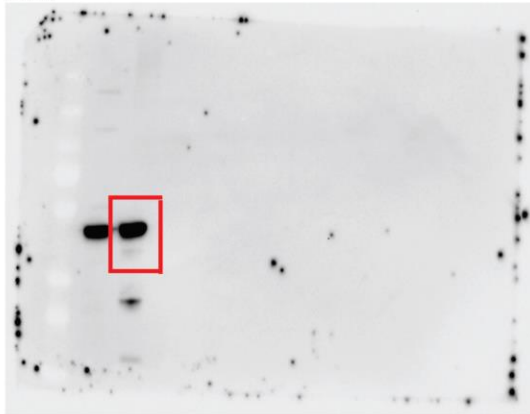

Supplementary Figure S16. Original blots for Supplementary Figure S9. The samples enclosed by the red box represent the samples included in Supplementary Figure S9. Panel 1, 2, 3, 4, 5, 6, 7, and 8 in the figure corresponds to the panel comprising samples ACC 47 - ACC 25, ACC 46 - ACC 52, ACC 29 – ACC 40, ACC 17- ACC 8, ACC 22 - ACC 44, ACC 9 - ACC 48, ACC 30 – ACC 54, and ACC 13 in Supplementary Figure S9 respectively.

| <b>Supplementary Table S1: Missense mutation details</b> |                               |                |                      |              |                        |                       |
|----------------------------------------------------------|-------------------------------|----------------|----------------------|--------------|------------------------|-----------------------|
| <b>Sample ID</b>                                         | <b><i>CTNNB1</i> mutation</b> |                | <b>Mutation Type</b> | <b>SIFT</b>  | <b>Polyphen-2</b>      | <b>PROVEAN</b>        |
|                                                          | <b>cDNA</b>                   | <b>Protein</b> |                      |              |                        |                       |
| ACC6                                                     | c.133T>C                      | p.S45P         | Missense             | Damaging (0) | Prob. Damaging (0.988) | Deleterious (-2.928)  |
| ACC 26                                                   | c.104T>A                      | p.I35N         | Missense             | Damaging (0) | Prob. Damaging (1.00)  | Deleterious (-5.175)) |
| ACC 28                                                   | c.136C>A                      | p.S45Y         | Missense             | Damaging (0) | Prob. Damaging (0.999) | Deleterious (-3.620)  |
| ACC 43                                                   | c.109C>G                      | p.S37C         | Missense             | Damaging (0) | Prob. Damaging (1.00)  | Deleterious (-3.951)  |
| ACC 46                                                   | c.105G>A                      | p.G34R         | Missense             | Damaging (0) | Prob. Damaging (1.00)  | Deleterious (-6.200)  |
| ACC 53                                                   | c.134C>T                      | p.S45F         | Missense             | Damaging (0) | Prob. Damaging (0.996) | Deleterious (-3.849)  |
| <b>Sample ID</b>                                         | <b><i>ZNRF3</i> mutation</b>  |                | <b>Mutation Type</b> | <b>SIFT</b>  | <b>Polyphen-2</b>      | <b>PROVEAN</b>        |
|                                                          | <b>cDNA</b>                   | <b>Protein</b> |                      |              |                        |                       |
| ACC31                                                    | c.646C>T                      | p.H216Y        | Missense             | Damaging (0) | Prob.Damaging (0.999)  | Deleterious (-5.577)  |
| <b>Sample ID</b>                                         | <b><i>APC</i> mutation</b>    |                | <b>Mutation Type</b> | <b>SIFT</b>  | <b>Polyphen-2</b>      | <b>PROVEAN</b>        |
|                                                          | <b>cDNA</b>                   | <b>Protein</b> |                      |              |                        |                       |
| ACC25                                                    | c.4666_4667insA               | p.T1556NfsTer3 | Insertion            | -            | -                      | -                     |
| ACC51                                                    | c.4391_4394del                | p.E1462GfsTer8 | Deletion             | -            |                        |                       |



| <b>Supplementary Table S2: Primer used for detection of deletion in DNA</b> |                       |
|-----------------------------------------------------------------------------|-----------------------|
| ACC 18                                                                      |                       |
| Fw primer                                                                   | GCTTCACTGTATGTATGATC  |
| Rw primer                                                                   | CTGACTTTCAGTAAGGCAATG |
| ACC 21                                                                      |                       |
| Fw primer                                                                   | CTAGAACTTCTGGTGATATGG |
| Rw primer                                                                   | CTGTGTAGATGGGATCTGC   |
| ACC 37                                                                      |                       |
| Fw primer                                                                   | CTGCTAGTTTCACCATATCC  |
| Rw primer                                                                   | CTCACTATCCACAGTTCAGC  |
| ACC 40                                                                      |                       |
| Fw primer                                                                   | CTGCTAGTTTCACCATATCC  |
| Rw primer                                                                   | CTGACTTTCAGTAAGGCAATG |

| <b>Supplementary Table S3: Details of deletion mutation</b> |                                |                      |               |
|-------------------------------------------------------------|--------------------------------|----------------------|---------------|
| Sample                                                      | Deletion (genome)              | Mutation(coding DNA) | Mutation(RNA) |
| ACC18                                                       | g.41217632_g.41224675del       | c.-48-6389_163del    | r.-48_241del  |
| ACC21                                                       | g. 41220754_g.41224725delinsA  | c.-48-3267_213del    | r.-48_241del  |
| ACC37                                                       | g. 41218557_g. 41224902delinsT | c.-48-5464_241-51del | r.-48_241del  |
| ACC40                                                       | g.41218317_g.41224723del       | c.-48-5704_211del    | r.-48_241del  |
| Transcript ID: ENST00000349496.9                            |                                |                      |               |

| Supplementary Table S4. Analysis of sequences at deletion junctions. |                               |                                                                 |
|----------------------------------------------------------------------|-------------------------------|-----------------------------------------------------------------|
| Sample                                                               | Deletion                      | Sequence at the site of deletion                                |
| ACC18                                                                | g.41217632_g.41224675del      | CAAAGGGT <u>AG</u> ttaccttta.....cctgaggaag <u>AGGATGTGG</u>    |
| ACC40                                                                | g.41218317_g.41224723del      | TAATACAATA <u>cttgaattgc</u> .....caggatttt <u>CTCAGTCCTT</u>   |
| ACC37                                                                | g. 41218557_g.41224902delinsT | GTAA <u>ACTAA</u> gagttgttt.....tagcaaata <u>CTTAG</u> GTAAA    |
| ACC21                                                                | g.41220754_g.41224725delinsA  | ATTATGAAT <u>Tg</u> ctagtataa.....gggattttct <u>CAG</u> TCCTTCA |

Two of the samples harboring the  $\Delta(2+3)$  deletion (ACC 18, ACC 40) displayed sequence microhomology whereas the other two samples (ACC 37, ACC 21) harbored reverse complement sequence at the breakpoint. The sequences in lowercase font depict the deleted regions and the uppercase font on the left and right depict deletions start and end sites. The microhomologous sequences are underlined whereas the reverse complement sequences are bold and underlined. The samples harboring reverse complement sequences also had similar patterns of deletion where an additional nucleotide was inserted at the breakpoint, unlike the ones displaying microhomology that harbored a defined breakpoint.

| Supplementary Table S5: Sequence at deletion site. |                |
|----------------------------------------------------|----------------|
| ACC18                                              |                |
|                                                    | deletion start |
| CAAAGGGTAG                                         | TTACTTTTA      |
| CCTGAGGAAG                                         | AGGATGTGGA     |
| deletion end                                       |                |
| ACC21                                              |                |
|                                                    | deletion start |
| ATTATGAATT                                         | GCTAGTATAAAA   |
| GGGATTTTCT                                         | CAGTCCTTCACT   |
| deletion end                                       |                |
| ACC37                                              |                |
|                                                    | deletion start |
| GTAAACTAA                                          | GAGTTGTTTT     |
| TAGCAATAC                                          | TTAGGTAAAT     |
| deletion end                                       |                |
| ACC40                                              |                |
|                                                    | deletion start |
| TAATACAATA                                         | CTTGAATTGC     |
| CAGGATTTT                                          | CTCAGTCCTT     |
| deletion end                                       |                |

Several small identical (flanking microhomology), complement or reverse complement sequences near the breakpoints were observed. Similar sequence are highlighted in red, reverse complement sequence in green and complementary sequence in blue

**Supplementary Table S6: Nucleotide percentile in Deletion start site**

| Tumours | Nos. (T) | Nos. (A) | Nos. (G) | Nos. (C) | AT(percent) |
|---------|----------|----------|----------|----------|-------------|
| ACC18   | 36T      | 34A      | 17G      | 13C      | 70%         |
| ACC21   | 43T      | 30A      | 20G      | 07C      | 73%         |
| ACC 37  | 31T      | 35A      | 21G      | 13C      | 72%         |
| ACC 40  | 47T      | 25A      | 11G      | 17C      | 72%         |

**Supplementary Table S7. Cohort details**

| ACC case | Mutations         | Gene          | Nuclear Accumulation | Age | Gender | Event (OS) (yr/mnth) | DFS (yr/mnth) | Tumour Size(cm) | TNM      | ENSAT Stage | Hormone Production   |
|----------|-------------------|---------------|----------------------|-----|--------|----------------------|---------------|-----------------|----------|-------------|----------------------|
| 1        | No                |               | NA                   | 32  | M      | 28 y/8 m             | 28 y/8 m      | 7x5x5           | T2 N0 M0 | II          | Cortisol             |
| 2        | No                |               | NA                   | 60  | F      | † 11 y/10 m          | †11y10m       | 9x8x6           | T2 N0 M0 | II          | None                 |
| 3        | No                |               | NA                   | 45  | F      | † 1 y/2 m            | †1y/2 m       | 10x6x3          | T2 N0 M0 | III         | Cortisol             |
| 4        | No                |               | +                    | 66  | F      | † 18 y/6 m           | †4y/5m        | 7x6             | T2 N0 M0 | II          | None                 |
| 5        | No                |               | -                    | 53  | F      | † 7 y/3 m            | †2y/5m        | 4.5x7.5x10      | T3 N0 M0 | III         | Androgen             |
| 6        | c.133T>C          | <i>CTNNB1</i> | +                    | 32  | F      | † 8 m                | †8m           | 8x6             | T2 N0 M0 | II          | None                 |
| 7        | No                |               | -                    | 60  | M      | † 5 y/2 m            | †4y           | 20x20           | T2 N0 M0 | II          | Cortisol+Aldosteron  |
| 8        | No                |               | -                    | 21  | M      | † 3 y/10 m           | †6m           | 18.5x14x10      | T2 N0 M0 | II          | Androgen             |
| 9        | No                |               | -                    | 20  | F      | 24 y/11 m            | 24y/11 m      | 5x5             | T1 N0 M0 | I           | Androgen             |
| 10       | No                |               | +                    | 69  | F      | † 1 y                | †11m          | 30x25x20        | T3 N1 M0 | III         | None                 |
| 11       | No                |               | +                    | 45  | F      | † 4 y/7 m            | †3y/5m        | 9x5x4           | T2 N0 M0 | II          | Cortisol+Androgen    |
| 12       | No                |               | +                    | 60  | F      | † 3 y/4 m            | †1y           | 9x9x10          | T3N1M0   | III         | Androgen             |
| 13       | No                |               | -                    | 63  | F      | † 2 y/3m             | †2y/3m        | 6.5x5x9         | T3N1M0   | III         | Cortisol             |
| 14       | No                |               | +                    | 36  | F      | † 1 y/6 m            | †1y/6 m       | 8.5x7x11        | T3 N1 M0 | III         | None                 |
| 15       | No                |               | -                    | 46  | M      | † 4 y/2 m            | †2y/4m        | 12x14           | T3 N1 M0 | III         | Cortisol             |
| 16       | No                |               | -                    | 58  | F      | 22 y/8 m             | 22 y/8 m      | 5x5.5x6         | T2 N0 M0 | II          | None                 |
| 17       | No                |               | -                    | 38  | F      | † 2 y/1 m            | †2 y/1 m      | 10 x 5          | T3 N0 M0 | III         | None                 |
| 18       | c.-48-6389_163del | <i>CTNNB1</i> | -                    | 29  | F      | † 3 y/7 m            | †9m           | 11x10x7         | T2 N0 M0 | II          | Cortisol+Androgen    |
| 19       | No                |               | +                    | NA  | F      | NA                   | NA            | NA              | NA       | NA          | NA                   |
| 20       | No                |               | +                    | 62  | M      | † 2 y/1 m            | †1y/2m        | 6x4x5           | T3 N0 M0 | III         | Cortisol             |
| 21       | c.-48-3267_213del | <i>CTNNB1</i> | +                    | 41  | M      | † 1 y                | †5m           | 15x11x8         | T3 N0 M0 | III         | Cortisol             |
| 22       | No                |               | -                    | 52  | M      | † 4 y/1 m            | †1y/10m       | 5x3.5           | T3 N0 M0 | III         | Cortisol+Aldosterone |
| 23       | No                |               | +                    | 70  | M      | † 5 m                | -             | 10x7x5          | T4 N0 M1 | IV          | Androgen             |
| 24       | No                |               | -                    | 26  | F      | † 10 y/1 m           | -             | 10x14           | T4 N0 M1 | IV          | Cortisol+Androgen    |

|    |                      |        |   |    |   |            |          |           |          |     |                      |
|----|----------------------|--------|---|----|---|------------|----------|-----------|----------|-----|----------------------|
| 25 | c.4666_4667insA      | APC    | - | 47 | F | I 6y/5 m   | †5y/10m  | 5x5       | T1 N0 M0 | I   | None                 |
| 26 | c.104T>A             | CTNNB1 | + | 74 | F | I 11y/8 m  | †11y/8 m | 16x15x12  | T4 N0 M0 | III | Cortisol+Androgen    |
| 27 | No                   |        | - | 67 | M | I 9 y/6 m  | †1y/7m   | 25x17x11  | T3 N0 M0 | III | None                 |
| 28 | c.136C>A             | CTNNB1 | + | 60 | F | I 11 y/8 m | †11 y/8  | 7.5x7.5   | T2 N0 M0 | II  | Cortisol+Androgen    |
| 29 | No                   |        | + | 34 | M | 14 y/3 m   | 14 y/3 m | 15x15     | T2 N0 M0 | II  | None                 |
| 30 | No                   |        | - | 62 | F | I 13 y/2 m | †4y/9m   | 18x18x10  | T2 N0 M0 | II  | None                 |
| 31 | c.646C>T             | ZNRF3  | - | 62 | M | I 9 y/7 m  | †4y/5m   | 15x13x9   | T2 N0 M0 | II  | Cortisol             |
| 32 | No                   |        | - | 60 | M | I 10 m     | †1m      | 5.5x5.5x6 | T4 N0 M0 | III | Cortisol             |
| 33 | No                   |        | - | 15 | F | 9 y/3 m    | 9y/3m    | 9x8x6     | T2 N0 M0 | II  | Androgen             |
| 34 | No                   |        | - | 58 | M | 7 y/8 m    | 7y/8m    | 10x8x6    | T2 N0 M0 | II  | None                 |
| 35 | No                   |        | - | 57 | F | I 3 m      | †2m      | 19x9x10   | T2 N0 M0 | II  | Cortisol+Androgen    |
| 37 | c.-48-5464_241-51del | CTNNB1 | + | 78 | M | I 4 m      | -        | 9x9x10    | T2 N0 M1 | IV  | Cortisol+Aldosterone |
| 38 | No                   |        | - | 75 | M | 6y/7m      | 6y/7m    | 30x20x8   | T2 N0 M0 | II  | Cortisol             |
| 40 | c.-48-               | CTNNB1 | + | 38 | F | I 13 m     | †3m      | 12x8x5    | T4 N0 M0 | III | None                 |
| 41 | No                   |        | - | 64 | F | 5 y/2 m    | 5y/2m    | 11x9x8    | T4 N0 M0 | III | Cortisol+Androgen    |
| 42 | No                   |        | + | 28 | M | I 4 m      | -        | 10x10x6.5 | T4 N0 M1 | IV  | Cortisol+Aldosterone |
| 43 | c.109C>G             | CTNNB1 | + | 3  | M | 4 y/8 m    | 4y/8m    | 7x4.5x4.5 | NA       | III | Cortisol+Androgen    |
| 44 | No                   |        | + | 67 | F | 5 y/1 m    | †3m      | 13x10.5x7 | NA       | III | None                 |
| 46 | c.105G>A             | CTNNB1 | + | 67 | F | I 1 y      | †1m      | 8.5x5x5   | T3 N1 M0 | III | Cortisol             |
| 47 | No                   |        | + | 50 | F | I 9 m      | †3m      | 8x8x6     | T4 N0 M0 | IV  | Cortisol             |
| 48 | No                   |        | + | 6  | F | 2 y/9 m    | 2y/9m    | 9x8x12    | T3 N0 M0 | II  | Cortisol+Androgen    |
| 49 | No                   |        | + | 63 | M | 2 y/6 m    | 2 y/6 m  | 26x15x14  | T3 N0 M0 | III | Androgen             |
| 50 | No                   |        | - | 1  | F | 2 y/4 m    | 2y/4m    | 6x8x6.5   | T4 N0 M0 | III | Androgen             |
| 51 | c.4391_4394del       | APC    | + | 8  | M | 2 y/1 m    | †1y/11m  | 11x8.5x8  | T2 N0 M0 | II  | Cortisol             |
| 52 | No                   |        | - | 14 | F | 7m         | 7m       | 5x5x4     | T1 N0 M0 | I   | Cortisol+Androgen    |
| 53 | c.134C>T             | CTNNB1 | + | 53 | F | I 1 m      | †1m      | 10x6x4    | T4 N0 M0 | III | Cortisol             |
| 54 | No                   |        | + | 43 | F | 1 y/8 m    | †2m      | 9x8x7     | T3 N1 M0 | III | Cortisol             |
| 55 | No                   |        | - | 43 | M | 1 y/2 m    | 1y       | 19x14x12  | T3 N0 M0 | III | Cortisol             |

I : Deceased; †:Recurrence; F/M: Female/male; NA: Not Available; TNM : Tumour Node Metastasis

| Supplementary Table S8                      |       |                  |                       |                            |                              |                            |
|---------------------------------------------|-------|------------------|-----------------------|----------------------------|------------------------------|----------------------------|
|                                             |       | Age at operation | tumour size           | Female;male                | Cortisol producing           | ENSAT stage                |
|                                             |       | (median in yrs)  | (median length in cm) |                            |                              | III+IV; I+II               |
| <i>APC/CTNNB1/ZNRF3</i> alterations         | n= 22 | 52.5 (n=22)      | 10 (n= 22)            | 14;8 (n=22)                | 15 (n=22)                    | 14;8 (n=22)                |
| <i>APC/CTNNB1/ZNRF3</i> wildtype            | n= 30 | 46 (n=29)        | 10 (n=29)             | 17;12 (n=29)               | 14 (n=29)                    | 15;14 (n=29)               |
|                                             |       |                  |                       | $\chi^2=0.005$<br>p=0.9412 | $\chi^2=1.291$<br>p=0.2559   | $\chi^2=0.320$<br>p=0.5719 |
| Nuclear accumulation                        | n=25  | 51.5 (n=24)      | 10 (n=24)             | 15;9 (n=24)                | 14 (n=24)                    | 17;7 (n=24)                |
| No nuclear accumulation                     | n=24  | 52.5 (n=24)      | 10 (n=24)             | 14;10 (n=24)               | 13 (n=24)                    | 11;13 (n=24)               |
|                                             |       | p=0.5159         | p=0.8097              | $\chi^2=0.087$<br>p=0.7679 | $\chi^2=0.085$<br>p=0.7711   | $\chi^2=2.143$<br>p=0.1432 |
| Active $\beta$ - catenin expression         | n=30  | 46 (n=29)        | 9 (n=29)              | 18;11 (n=29)               | 16 (n=29)                    | 16;13 (n=29)               |
| lack of active $\beta$ - catenin expression | n=16  | 58 (n=16)        | 10 ((n=16)            | 9;7 (n=16)                 | 9 (n=16)                     | 8;16 (n=16)                |
|                                             |       | p=0.3744         | p=0.5059              | $\chi^2=0.004$<br>p=0.9493 | $\chi^2=0.005$<br>p=0.0.9445 | $\chi^2=1.723$<br>p=0.1893 |
| Cohort                                      | n=52  | 52 (n=51)        | 10 (n=51)             | 31;20 (n=51)               | 29 (n=51)                    | 29;22 (n=51)               |

| Supplementary Table S9. Cox regression analysis for overall survival |                       |         |                                |         |
|----------------------------------------------------------------------|-----------------------|---------|--------------------------------|---------|
| <b>Univariate analysis</b>                                           |                       |         |                                |         |
|                                                                      | Cohort (n=51)         |         | Cohort – childhood ACC ( n=46) |         |
|                                                                      | HR (95% CI)           | P value | HR (95% CI)                    | P value |
| Age at operation                                                     | 1.012 (0.994 – 1.032) | 0.203   | 1.006 (0.986 – 1.,027          | 0.578   |
| Cortisol production                                                  | 1.763 (0.873 – 3.559) | 0.114   | 1.890 (0.939– 3.806)           | 0.074   |
| ENSAT staging (I/II vs II/IV)                                        | 4.076 (1.798 – 9.244) | 0.001   | 4.160 (1.832 – 9.448)          | 0.001   |
| Gender                                                               | 1.037 (0.510 – 2.108) | 0.919   | 0.993 (0.491 – 2.025)          | 0.993   |
| Size                                                                 | 1.009 (0.954 – 1.068) | 0.752   | 1.003 (0.948 -1.062)           | 0.907   |
| <i>APC/CTNNB1/ZNRF3</i> alteration                                   | 2.493 (1.211-5.131)   | 0.013   | 2.481 (1.206-5.107)            | 0.014   |
|                                                                      |                       |         |                                |         |
| <b>Multivariate analysis</b>                                         |                       |         |                                |         |
|                                                                      | Cohort (n=51)         |         | Cohort – childhood ACC ( n=46) |         |
|                                                                      | HR (95% CI)           | P value | HR (95% CI)                    | P value |
| Grading                                                              | 3.480 (1.528-7.927)   | 0.003   | 3.604 (1.589-8.174)            | 0.002   |
| <i>APC/CTNNB1/ZNRF3</i> alteration                                   | 1.976 (0.949-4.113)   | 0.069   | 2.028 (0.979-4.201)            | 0.057   |

**Supplementary Table S10**

| <b>Supplementary Table S10</b> |                      |                          |
|--------------------------------|----------------------|--------------------------|
| <i>CTNNB1</i>                  | <b>DNA primers</b>   |                          |
|                                | Exon 3               |                          |
|                                | Fw primer            | CAATGGGTCATATCACAGATTCTT |
|                                | Rw primer            | CTGTGTAGATGGGATCTGC      |
|                                | Exon 5               |                          |
|                                | Fw primer            | GCTCAAGGGGAGTAGTTTCAGA   |
|                                | Rw primer            | TCCACTGGTGAAGTGGGAAG     |
|                                | <b>cDNA Primers</b>  |                          |
|                                | Fw primer            | GAAGGTCTGAGGAGCAGCTTC    |
|                                | Rw primer            | ACAACACAGAATCCACTGGTG    |
| <i>ZNRF3</i>                   | <b>DNA primers</b>   |                          |
|                                | Exon 2               | GGGTTGAAAACTGTCCCA       |
|                                |                      | CCACCTCATGCAACTCAGC      |
|                                | Exon 3               | GATTGCCAAGGCCAACTTT      |
|                                |                      | GGGACAAGCCAAGCTACTA      |
|                                | Exon 4               | CTGGAGGATTCCAGACAGGT     |
|                                |                      | GGGTATGCCAGCATTCAGA      |
|                                | Exon 5               | GATAGCCCATGTGCCGCTTA     |
|                                |                      | GCTGTGAGGCTCCATGTTGC     |
|                                | Exon 6               | GTCTGCCTGTCCCAGTGAAT     |
|                                |                      | CCTTCTAGGTCTTGGGCACC     |
|                                | Exon 7               | GCTGTGCAGAACTCCTTGG      |
|                                |                      | GAGTGTTCCCAAGCCTGCG      |
|                                | Exon 8a              | GCCTCTGACACCAGTATGCT     |
|                                |                      | CTACCACAGAGTCACTGGAG     |
|                                | Exon 8b              | GCTTCAGCTGCTATCACGGC     |
|                                |                      | GTCCTGGGCAAATGGTCGG      |
|                                | Exon 8c              | TGGCAGCAGCACCTTGTTT      |
|                                |                      | GGCCAGGCTGAGGAGTAACC     |
|                                | Exon 9               | TTGCCTGGTCCCATGTGTGG     |
|                                | TGGGTTGACAAGGAGGGCTC |                          |



## References

- 1 Xing, Y., Clements, W. K., Kimelman, D. & Xu, W. Crystal structure of a beta-catenin/axin complex suggests a mechanism for the beta-catenin destruction complex. *Genes & development* **17**, 2753-2764, doi:10.1101/gad.1142603 (2003).
- 2 Gottardi, C. J. & Peifer, M. Terminal regions of beta-catenin come into view. *Structure* **16**, 336-338, doi:10.1016/j.str.2008.02.005 (2008).
